# Supplementary material for: A comparative study of early childhood education and care national documents between China and Finland
Source: Frontiers journal article supplement (doi:10.3389/feduc.2024.1392920), 2024-07-23
Supplement: Data_Sheet_1.PDF [file Data_Sheet_1.PDF]

## *Supplementary Material*

# **A Comparative Study of Early Childhood Education and Care (ECEC) National Documents between China and Finland**

**Shuanghong Jenny Niu<sup>1</sup>, Olli-Pekka Malinen<sup>1</sup>, Inkeri Ruokonen<sup>1</sup>, Anitta Melasalmi<sup>2</sup>, Signe Siklander<sup>3</sup>, Xinghua Wang<sup>4</sup>, Heyi Zhang<sup>4</sup>, Tarja-Riitta Hurme<sup>2</sup>, Zhiguang Zhang<sup>4</sup>, Jaakko Moilanen<sup>3</sup>, Xiaowei Li<sup>4</sup>, Lijuan Wang<sup>3</sup>**

<sup>1</sup>Faculty of Educational Sciences, University of Helsinki, Finland

<sup>2</sup>Faculty of Education, University of Turku, Finland

<sup>3</sup>Faculty of Education and Psychology, University of Oulu, Finland

<sup>4</sup>Faculty of Education, Beijing Normal University, China

**\* Correspondence:**

Corresponding Author

[jenny.niu@helsinki.fi](mailto:jenny.niu@helsinki.fi)

## **1 Supplementary Data**

Supplementary data includes:

(Finnish) National Core Curriculum (NCC) for Early Childhood Education and Care (ECEC), (2022). Available online and accessed on Feb.2024

<https://www.oph.fi/sites/default/files/documents/National%20core%20curriculum%20for%20ECEC%202022.pdf>

(Chinese) Kindergarten Education Guidelines (KEG) for aged 3-6 old children, (2001), translated English version, available upon request from the corresponding author at [jenny.niu@helsinki.fi](mailto:jenny.niu@helsinki.fi).

(Chinese) Early Learning and Development Guidelines (ELDG) for aged 3-6 old children, (2012), The English version of KEG document is downed from UNICEF website, which was translated by UNICEF. Available online and accessed on Feb.2024

<https://www.unicef.cn/sites/unicef.org.china/files/2018-10/2012-national-early-learning-development-guidelines.pdf>

(Chinese) Childcare Institution Care Guidance Outline (CICGO) for aged 0-3 old children, (2021), translated English version, available upon request from the corresponding author at [jenny.niu@helsinki.fi](mailto:jenny.niu@helsinki.fi).

## 2 Supplementary Figures and Tables

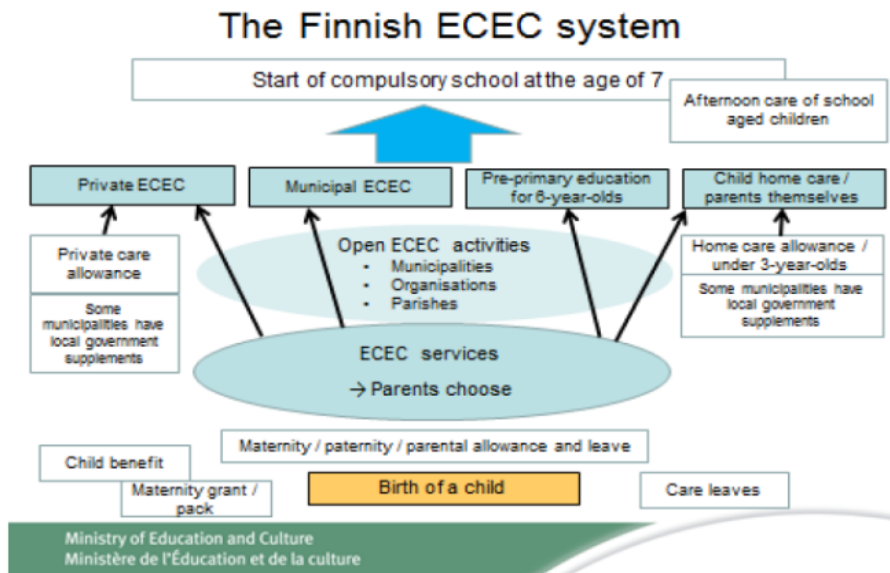

**Supplementary Figure 1.** The Finnish ECEC system (Ministry of Education and Culture 2021)

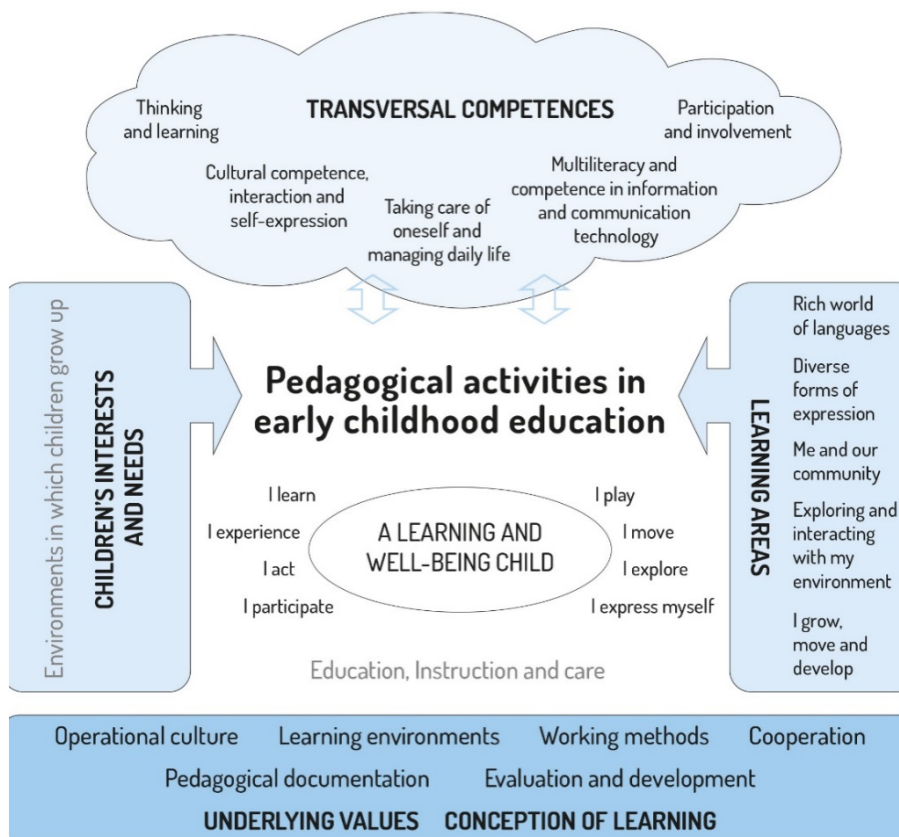

**Supplementary Figure 2.** The framework for pedagogical activity in early childhood education and care (FNAE, 2022, page 35)

**Supplementary Table 1.** List of national-level Chinese ECEC educational documents and Finnish ECEC national core curricula in this study

| Country | Document name in original language    | Document name translated in English                             | Document abbreviation | Target ages (years old) | Publish year | Provider                                                                 |
|---------|---------------------------------------|-----------------------------------------------------------------|-----------------------|-------------------------|--------------|--------------------------------------------------------------------------|
| Finland | Varhaiskasvatussuunnitelman perusteet | National core curriculum for early childhood education and care | NCC                   | 0-6                     | 2022         | Finnish national agency for education, Ministry of Education and Culture |
| China   | 幼儿园教育指导纲要                             | Kindergarten Education Guideline                                | KEG                   | 3-6                     | 2001         | Ministry of Education                                                    |
| China   | 3-6岁儿童学习与发展指南                         | Early Learning and Development Guidelines                       | ELDG                  | 3-6                     | 2012         | Ministry of Education                                                    |
| China   | 托育机构保育指导大纲                            | Childcare Institution Care Guidance Outline                     | CICGO                 | 0-3                     | 2021         | National Health commission                                               |

**Supplementary Table 2.** Key Aspects and Primary Components Identified in Chinese ECEC Educational Documents and Finnish ECEC National Core Curricula

| Document names                                                                                                                                                                                                                                                                                                                | Main categories and contents                                                                                                                                                                                                                                                                                                                                                                                                                                                                                                                                                                                                                                                                                                                                                                                                                                                                                                                                                                                                                                                                | Identified key aspects                                                                                                                                                                                                                                                                                                                                                                                                 | Primary components                                                                                                                                                                                   |
|-------------------------------------------------------------------------------------------------------------------------------------------------------------------------------------------------------------------------------------------------------------------------------------------------------------------------------|---------------------------------------------------------------------------------------------------------------------------------------------------------------------------------------------------------------------------------------------------------------------------------------------------------------------------------------------------------------------------------------------------------------------------------------------------------------------------------------------------------------------------------------------------------------------------------------------------------------------------------------------------------------------------------------------------------------------------------------------------------------------------------------------------------------------------------------------------------------------------------------------------------------------------------------------------------------------------------------------------------------------------------------------------------------------------------------------|------------------------------------------------------------------------------------------------------------------------------------------------------------------------------------------------------------------------------------------------------------------------------------------------------------------------------------------------------------------------------------------------------------------------|------------------------------------------------------------------------------------------------------------------------------------------------------------------------------------------------------|
| (Finnish) National core curriculum for ECEC (NCC) (0-6 years old)<br><br>(Chinese) Kindergarten Education Guideline (KEG) (3-6 years old)<br><br>(Chinese) Early Learning and Development Guidelines for Children (ELDG) (3-6 years old)<br><br>(Chinese) Childcare Institution Care Guidance Outline (CICGO) (0-3 years old) | <ol style="list-style-type: none"> <li>1. Legislation and administration</li> <li>2. Mission and goals</li> <li>3. Operational culture</li> <li>4. Planning and implementing pedagogical activities</li> <li>5. Support the child</li> <li>6. Evaluation</li> </ol><br><ol style="list-style-type: none"> <li>1. Legislation</li> <li>2. General guidelines</li> <li>3. Learning areas</li> <li>4. Organization and implementation</li> <li>5. Evaluation</li> </ol><br><ol style="list-style-type: none"> <li>i. Health</li> <li>ii. Language</li> <li>iii. Social development</li> <li>iv. Science</li> <li>v. Arts</li> </ol><br><ol style="list-style-type: none"> <li>1. General guidelines and basic principles</li> <li>2. Education goals, contents and requirements</li> <li>3. Organization and evaluation</li> </ol> <ol style="list-style-type: none"> <li>i. Nutrition and feeding</li> <li>ii. Sleep</li> <li>iii. Daily life skills and hygiene habits</li> <li>iv. Movements</li> <li>v. Language</li> <li>vi. Cognition</li> <li>vii. Emotion and social skills</li> </ol> | <ol style="list-style-type: none"> <li>1. Legislation and administrative structure</li> <li>2. General guidelines, aims, operational culture and collaboration</li> <li>3. Learning areas and transversal competencies</li> <li>4. Age group pedagogy vs. child's individual development plan</li> <li>5. Children's involvement and participation</li> <li>6. Special needs support</li> <li>7. Evaluation</li> </ol> | <ol style="list-style-type: none"> <li>Overall administration, legislation, guidelines, aims and principles</li> <li>Planning and implementing Pedagogical activities</li> <li>Evaluation</li> </ol> |

**Supplementary Table 3.** Summary of Similarities and Differences in Key Aspects and Primary Components Identified in Chinese ECEC Educational Documents and Finnish ECEC National Core Curricula

| Primary components                                   | Key aspects                                                     | China                                                                                                                                                                                                                                                                 | Finland                                                                                                                           | Summary of the main findings                                                                                                                                                                                                                                                                                                                                                                                                                                                                                                                                                                                                                                                                                                                                                                                                                                                                                                           |
|------------------------------------------------------|-----------------------------------------------------------------|-----------------------------------------------------------------------------------------------------------------------------------------------------------------------------------------------------------------------------------------------------------------------|-----------------------------------------------------------------------------------------------------------------------------------|----------------------------------------------------------------------------------------------------------------------------------------------------------------------------------------------------------------------------------------------------------------------------------------------------------------------------------------------------------------------------------------------------------------------------------------------------------------------------------------------------------------------------------------------------------------------------------------------------------------------------------------------------------------------------------------------------------------------------------------------------------------------------------------------------------------------------------------------------------------------------------------------------------------------------------------|
| Overall legislation, guidelines, aims and principles | Legislation and administrative structure                        | Yes                                                                                                                                                                                                                                                                   | Yes                                                                                                                               | Lots of similarities in this overall level and these two key aspects with minor differences                                                                                                                                                                                                                                                                                                                                                                                                                                                                                                                                                                                                                                                                                                                                                                                                                                            |
|                                                      | General guidelines, aims, operational culture and collaboration | Yes                                                                                                                                                                                                                                                                   | Yes                                                                                                                               |                                                                                                                                                                                                                                                                                                                                                                                                                                                                                                                                                                                                                                                                                                                                                                                                                                                                                                                                        |
| Planning and implementing Pedagogical activities     | Learning areas and transversal competencies                     | The Learnings were very clearly defined and described in both countries. Transversal competencies were more specifically defined and highlighted in Finnish ECEC.                                                                                                     |                                                                                                                                   | <p>The primary component of pedagogical considerations exhibited the most significant difference between the ECEC practices of these two countries.</p> <ul style="list-style-type: none"><li>◆ Both nations provided clear descriptions of learning areas, with Finnish ECEC placing greater emphasis on transversal competencies.</li><li>◆ Age-based pedagogy was absent in Finnish ECEC, whereas the concept of a child's individual development plan was not addressed in Chinese ECEC.</li><li>◆ The Chinese ECEC approach tends to be more teacher-directed, focusing on ensuring that pedagogical activities are engaging and appealing, while Finnish ECEC emphasizes promoting children's initiatives, involvement, and participation in the planning of pedagogical activities.</li><li>◆ In terms of special needs support, Finnish ECEC offered extensive content, whereas Chinese ECEC had minimal provisions.</li></ul> |
|                                                      | ⇒ Learning areas                                                | Yes                                                                                                                                                                                                                                                                   | Yes                                                                                                                               |                                                                                                                                                                                                                                                                                                                                                                                                                                                                                                                                                                                                                                                                                                                                                                                                                                                                                                                                        |
|                                                      | ⇒ Transversal competencies                                      | some                                                                                                                                                                                                                                                                  | Yes                                                                                                                               |                                                                                                                                                                                                                                                                                                                                                                                                                                                                                                                                                                                                                                                                                                                                                                                                                                                                                                                                        |
|                                                      | Age group pedagogy vs. child's individual development plan      | Age group pedagogy was strongly emphases and described in Chinese ECEC, while it is not mentioned at all in Finnish ECEC. Child's individual development plan is strongly highlighted and defined in Finnish ECEC, while it was not mentioned at all in Chinese ECEC. |                                                                                                                                   |                                                                                                                                                                                                                                                                                                                                                                                                                                                                                                                                                                                                                                                                                                                                                                                                                                                                                                                                        |
|                                                      | ⇒ Age group pedagogy                                            | Yes                                                                                                                                                                                                                                                                   | No                                                                                                                                |                                                                                                                                                                                                                                                                                                                                                                                                                                                                                                                                                                                                                                                                                                                                                                                                                                                                                                                                        |
|                                                      | ⇒ child's individual development plan                           | No                                                                                                                                                                                                                                                                    | Yes                                                                                                                               |                                                                                                                                                                                                                                                                                                                                                                                                                                                                                                                                                                                                                                                                                                                                                                                                                                                                                                                                        |
|                                                      | Children's involvement and participation                        | Highlighting the importance of teachers' role to ensure the pedagogical activities engaging and appealing to children, thus encouraging their active participation.                                                                                                   | Emphasizing on promoting children's initiatives, involvement, and active participation in the planning of pedagogical activities. |                                                                                                                                                                                                                                                                                                                                                                                                                                                                                                                                                                                                                                                                                                                                                                                                                                                                                                                                        |
|                                                      | Special needs support                                           | Almost none                                                                                                                                                                                                                                                           | Yes, with extensive content                                                                                                       |                                                                                                                                                                                                                                                                                                                                                                                                                                                                                                                                                                                                                                                                                                                                                                                                                                                                                                                                        |
| Evaluation                                           | Evaluation                                                      | Yes                                                                                                                                                                                                                                                                   | Yes                                                                                                                               | There were lots of similarities in the Evaluation aspect with minor differences.                                                                                                                                                                                                                                                                                                                                                                                                                                                                                                                                                                                                                                                                                                                                                                                                                                                       |
